# Supplementary material for: Accelerated RNA secondary structure design using preselected sequences for helices and loops
Source: PubMed Central journal article supplement — RNA. 2018 Nov;24(11):1555–67. doi: 10.1261/rna.066324.118 (PMC6191713; doi:10.1261/rna.066324.118), 2018-11
Supplement: supp_066324.118_Supplemental_Material.pdf [file supp_066324.118_Supplemental_Material.pdf]

Supplement to Accompany:

# Accelerated RNA Secondary Structure Design Using Pre-Selected Sequences for Helices and Loops

Stanislav Bellaousov,<sup>1</sup> Mohammad Kayedkhordeh,<sup>1</sup> Raymond J. Peterson,<sup>2</sup> and David H. Mathews<sup>1,3,\*</sup>

<sup>1</sup>Department of Biochemistry & Biophysics and Center for RNA Biology, University of Rochester Medical Center, 601 Elmwood Ave, Box 712, Rochester, New York 14642, United States

<sup>2</sup>Celadon Laboratories, Inc., Suite 521, 6525 Belcrest Road, Hyattsville, MD 20782, United States

<sup>3</sup>Department of Biostatistics and Computational Biology, University of Rochester Medical Center, 601 Elmwood Ave, Box 712, Rochester, New York 14642, United States

\*Address correspondence to [David\\_Mathews@urmc.rochester.edu](mailto:David_Mathews@urmc.rochester.edu)

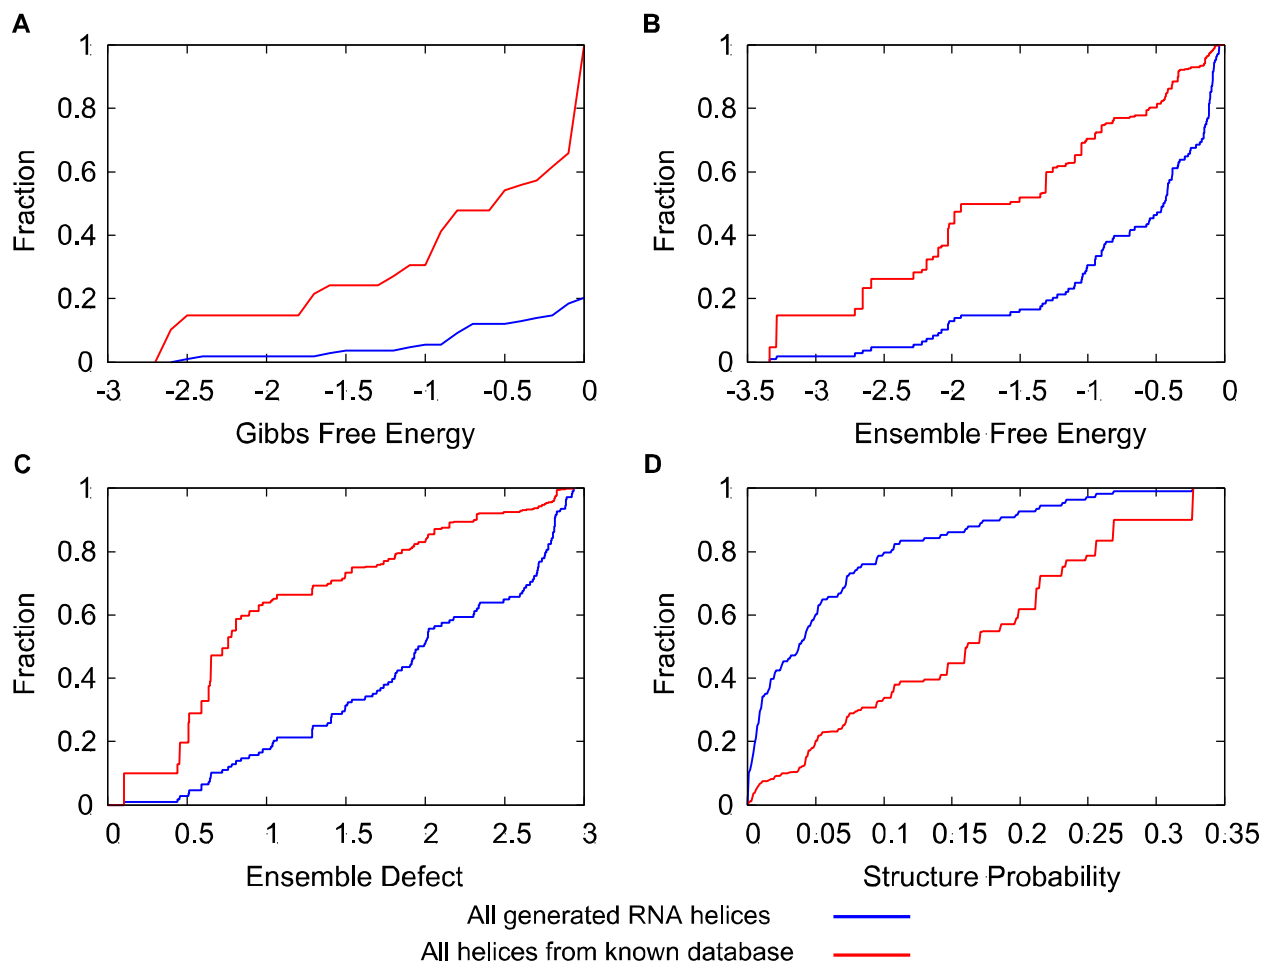

**Figure S1. Trends in natural sequences for helices of length 3.** Distributions of folding free energy change, ensemble folding free energy change, ensemble defect, and structure probability for three base pair helices. Cumulative distribution plots are provided in red for unique sequences observed in the database of RNA structures and in blue for all possible helices. Panel A is Gibbs free energy change, panel B is ensemble Gibbs free energy change, panel C is ensemble defect, and panel D is the probability of helix formation.

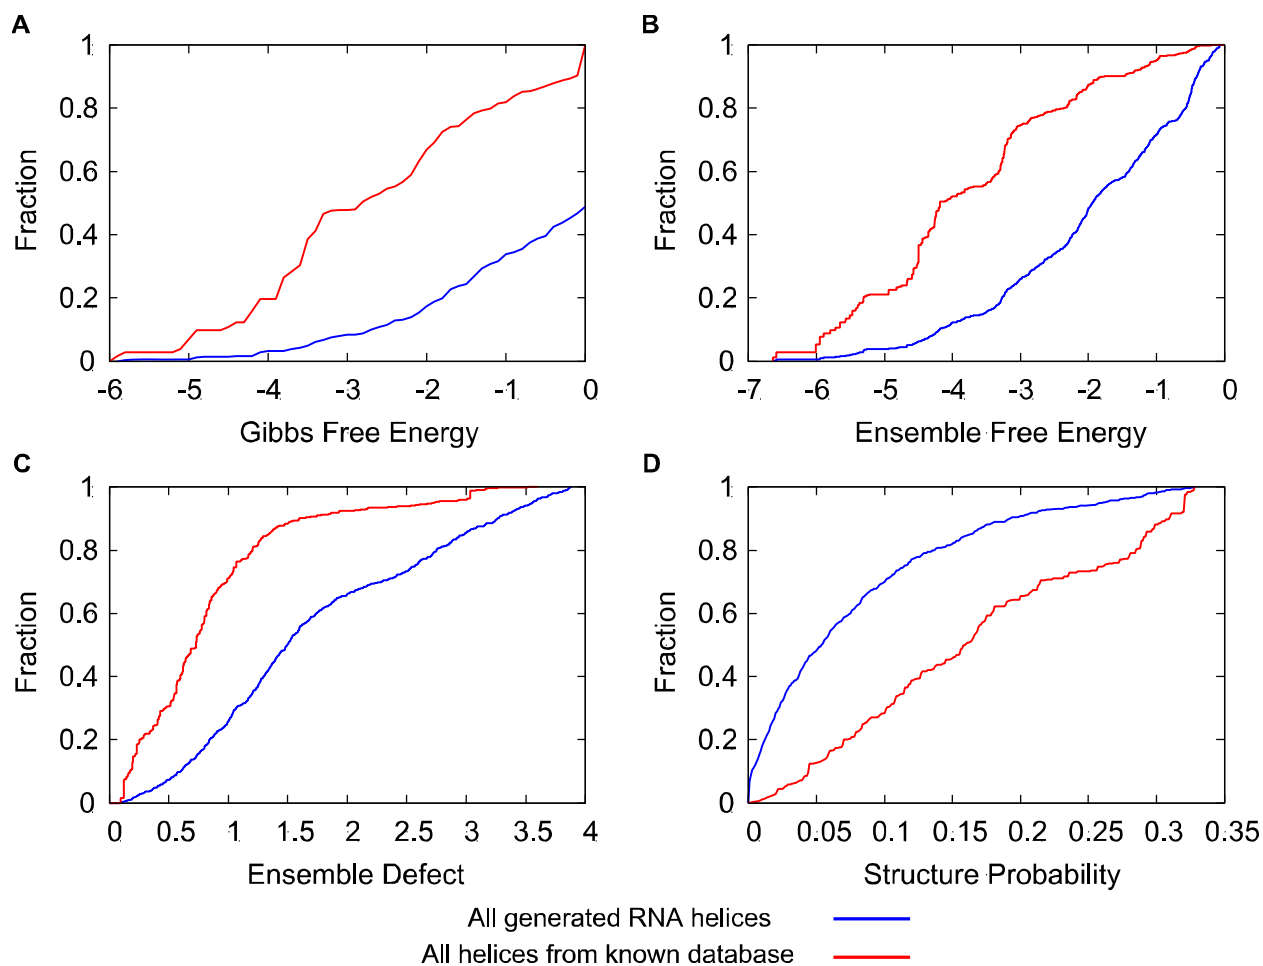

**Figure S2. Trends in natural sequences for helices of length four.** Distributions of folding free energy change, ensemble folding free energy change, ensemble defect, and structure probability for four base pair helices. Cumulative distribution plots are provided in red for unique sequences observed in the database of RNA structures and in blue for all possible helices. Panel A is Gibbs free energy change, panel B is ensemble Gibbs free energy change, panel C is ensemble defect, and panel D is the probability of helix formation.

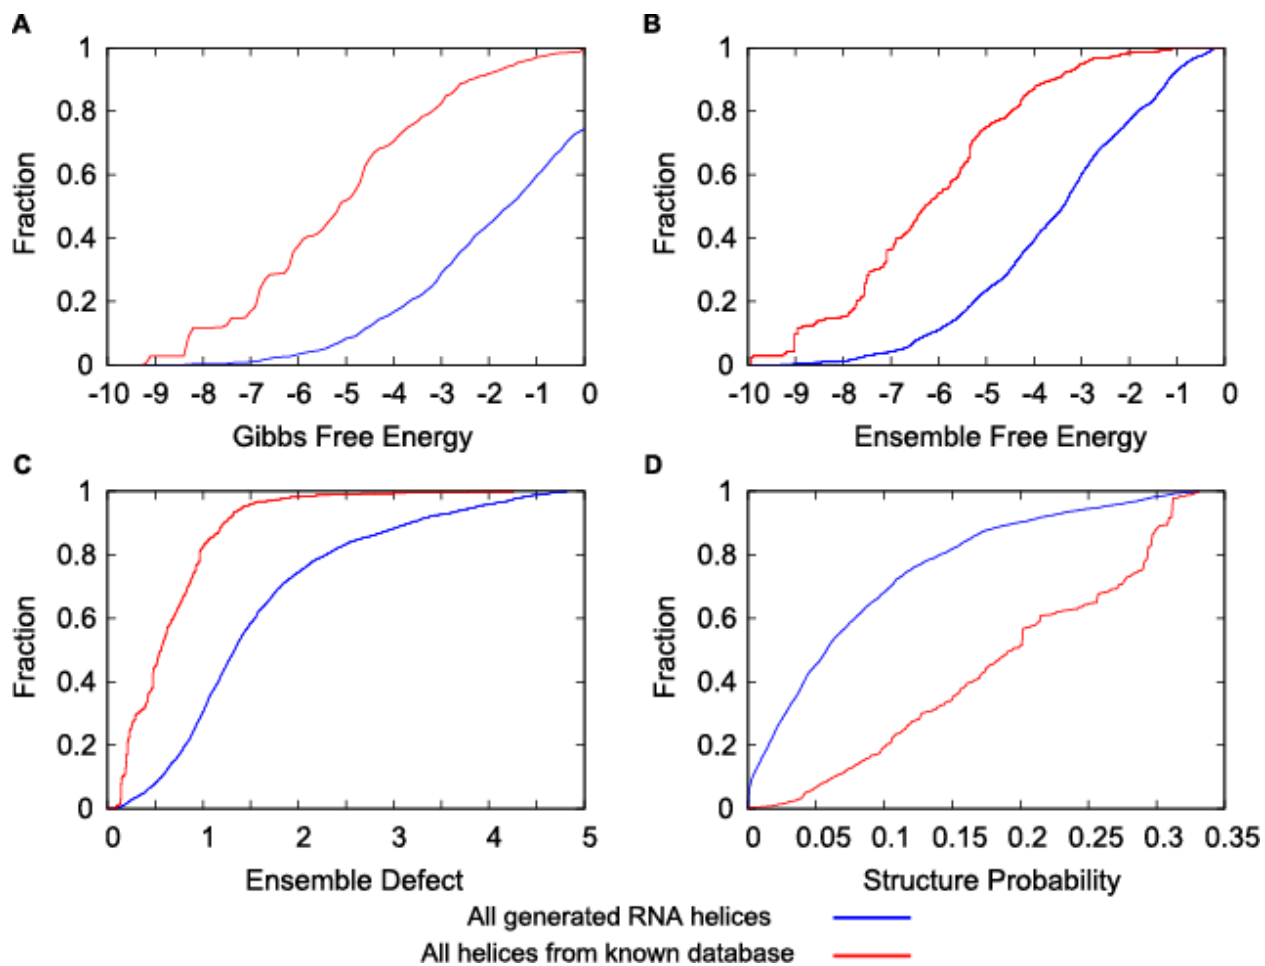

**Figure S3. Trends in natural sequences for helices of length five.** Distributions of folding free energy change, ensemble folding free energy change, ensemble defect, and structure probability for five base pair helices. Cumulative distribution plots are provided in red for unique sequences observed in the database of RNA structures and in blue for all possible helices. Panel A is Gibbs free energy change, panel B is ensemble Gibbs free energy change, panel C is ensemble defect, and panel D is the probability of helix formation.

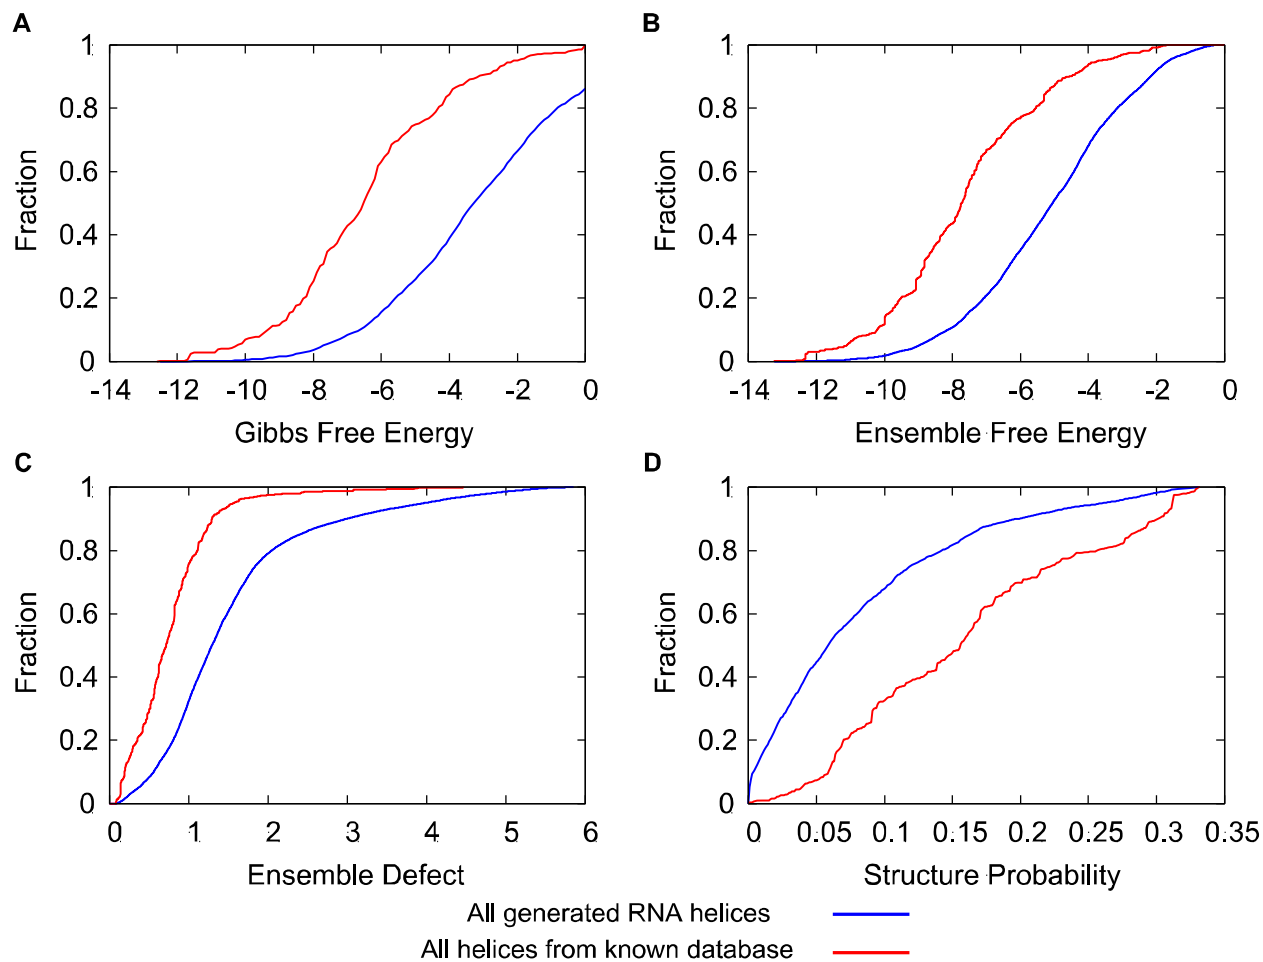

**Figure S4. Trends in natural sequences for helices of length six.** Distributions of folding free energy change, ensemble folding free energy change, ensemble defect, and structure probability for six base pair helices. Cumulative distribution plots are provided in red for unique sequences observed in the database of RNA structures and in blue for all possible helices. Panel A is Gibbs free energy change, panel B is ensemble Gibbs free energy change, panel C is ensemble defect, and panel D is the probability of helix formation.

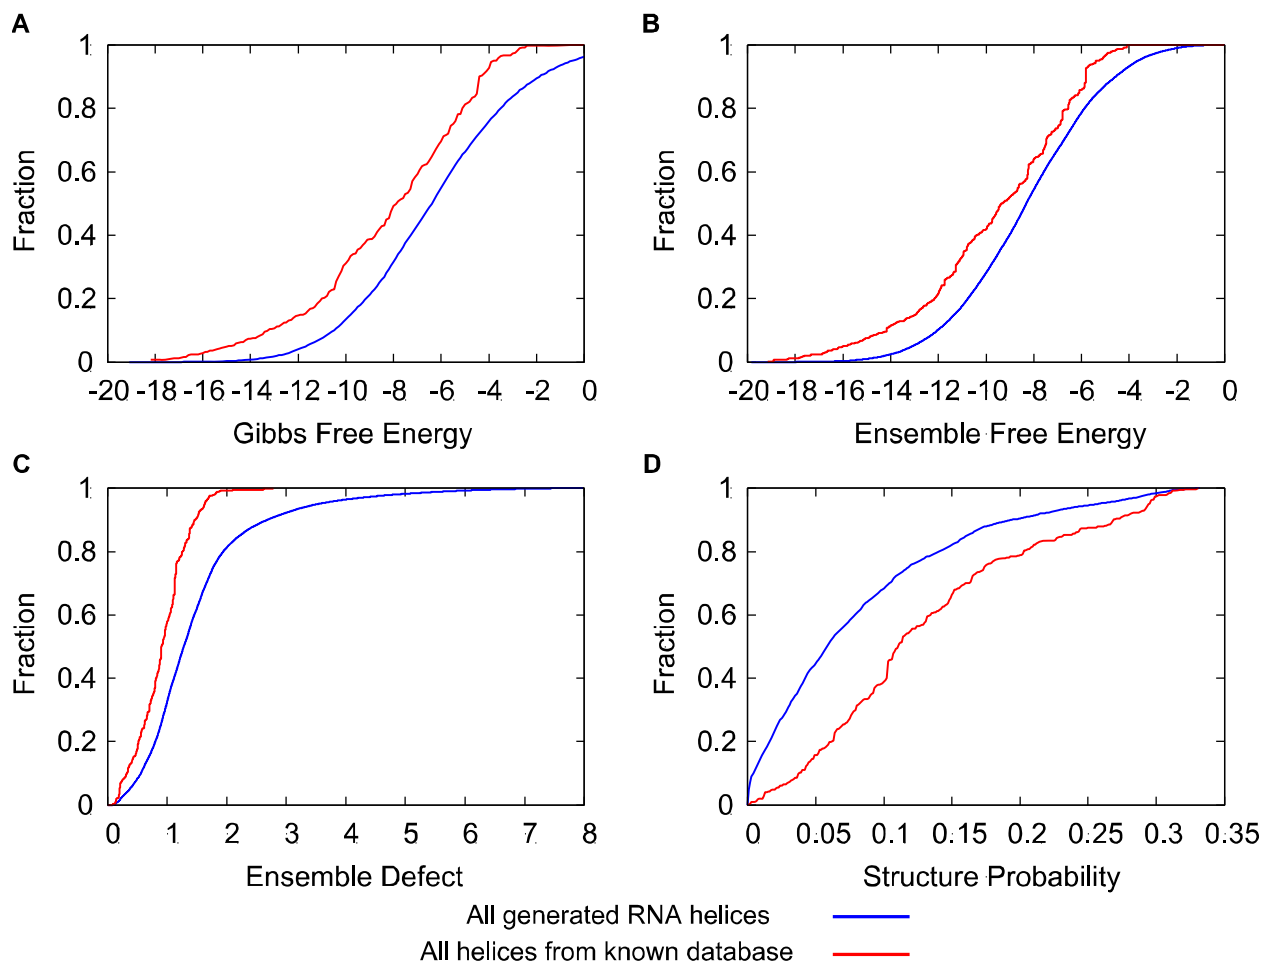

**Figure S5. Trends in natural sequences for helices of length eight.** Distributions of folding free energy change, ensemble folding free energy change, ensemble defect, and structure probability for eight base pair helices. Cumulative distribution plots are provided in red for unique sequences observed in the database of RNA structures and in blue for all possible helices. Panel A is Gibbs free energy change, panel B is ensemble Gibbs free energy change, panel C is ensemble defect, and panel D is the probability of helix formation.

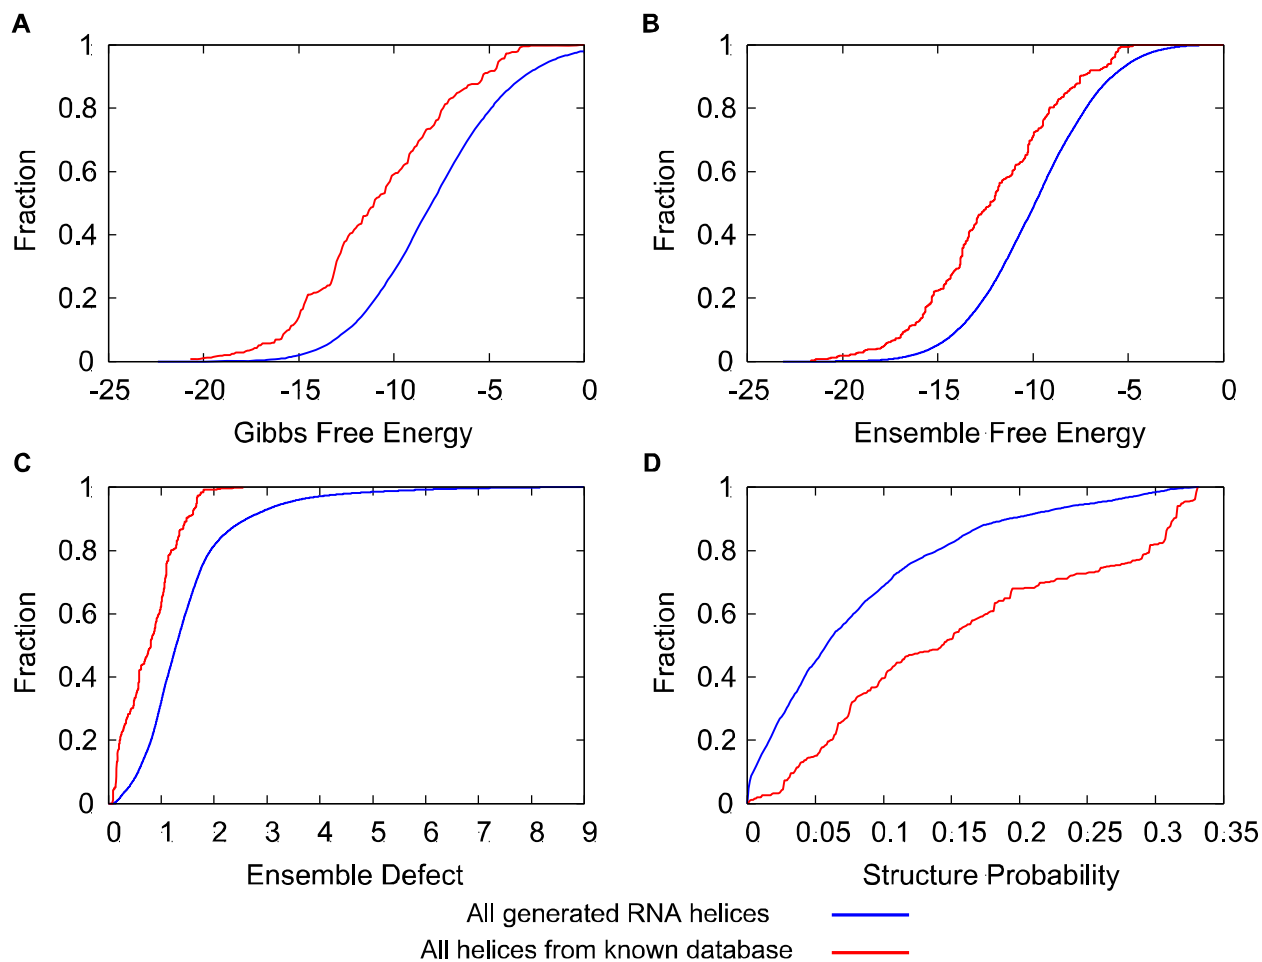

**Figure S6. Trends in natural sequences for helices of length nine.** Distributions of folding free energy change, ensemble folding free energy change, ensemble defect, and structure probability for nine base pair helices. Cumulative distribution plots are provided in red for unique sequences observed in the database of RNA structures and in blue for all possible helices. Panel A is Gibbs free energy change, panel B is ensemble Gibbs free energy change, panel C is ensemble defect, and panel D is the probability of helix formation.

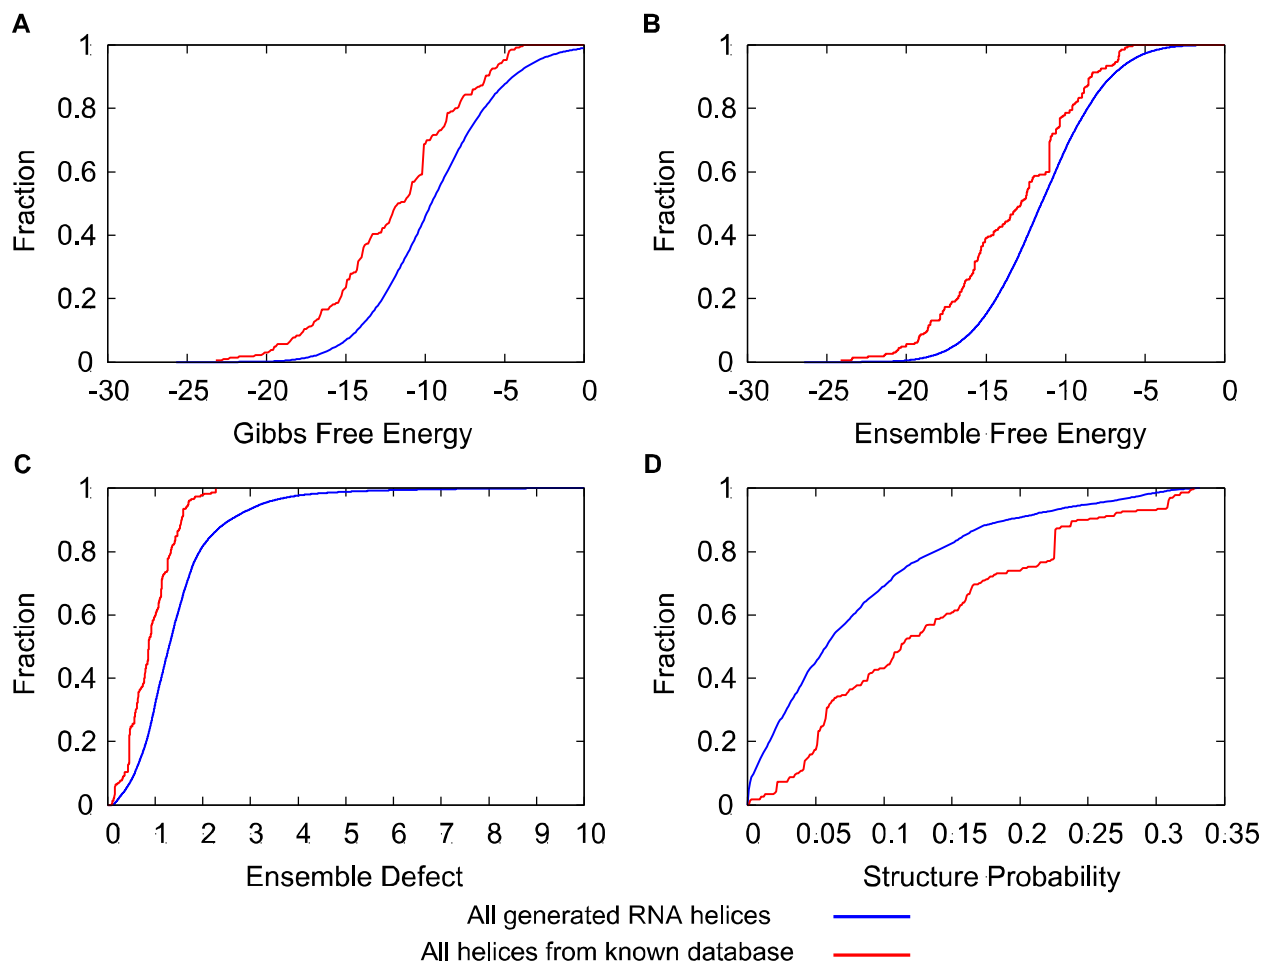

**Figure S7. Trends in natural sequences for helices of length ten.** Distributions of folding free energy change, ensemble folding free energy change, ensemble defect, and structure probability for ten base pair helices. Cumulative distribution plots are provided in red for unique sequences observed in the database of RNA structures and in blue for all possible helices. Panel A is Gibbs free energy change, panel B is ensemble Gibbs free energy change, panel C is ensemble defect, and panel D is the probability of helix formation.



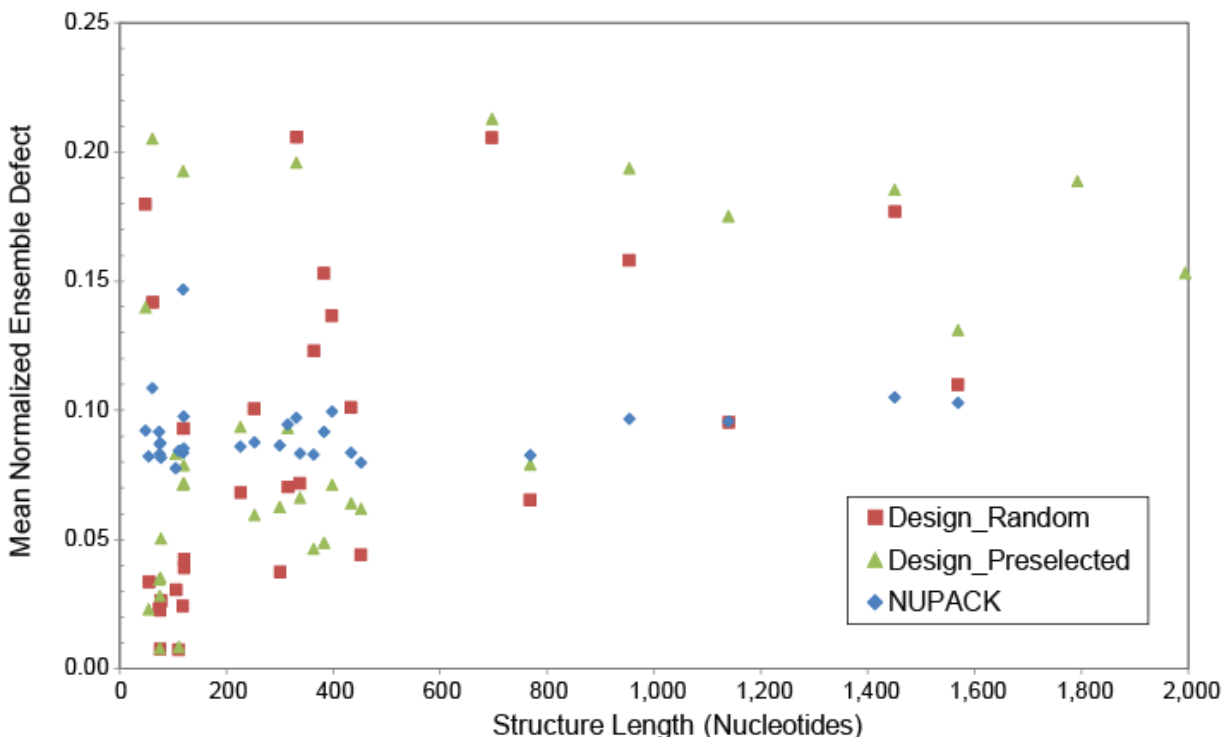

**Figure S8. Mean normalized ensemble defect for long structures.** Designs were made for sequences of up to 1995 nucleotides (Table S7). Mean NED is shown for ten calculations for each target structure. Design times were capped to 75 days of running time (6,480,000 seconds). Points missing for NUPACK and *Design\_Random* had one or more designs that reached the maximum runtime and were terminated, so the mean could not be calculated. Designs were performed on a single core of an Opteron 2427 processor. NUPACK was run using rna99 thermodynamic parameters at 37 °C, the NED threshold was set to 0.1 so that NUPACK produced structures of similar NED as *Design\_Random*, and other parameters were set to defaults.

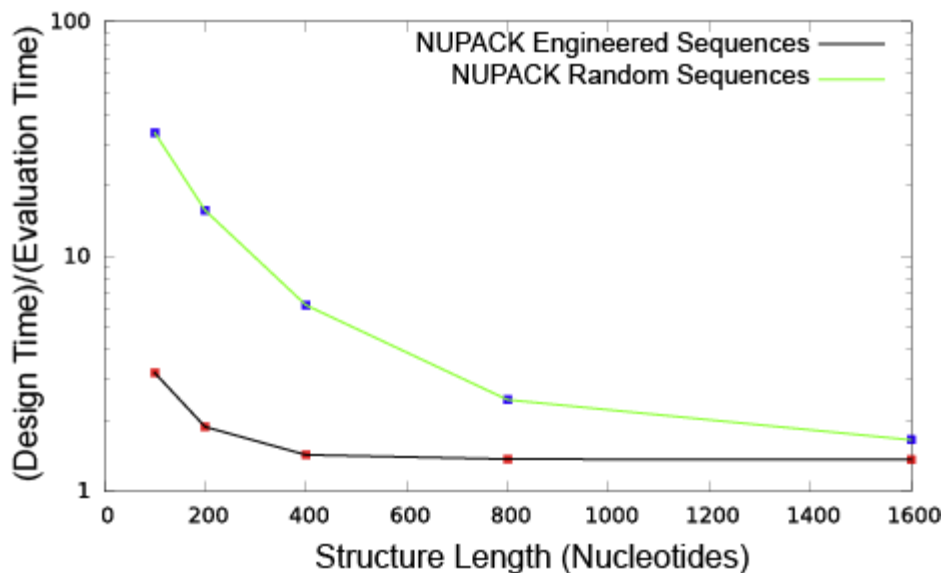

**Figure S9. Asymptotic convergence as a function of length of the ratio of design cost to design evaluation on engineered structures and random structures, using the structures provided by Zadeh et al. (2011b).** The thermodynamic parameters were rna1999 at 37 °C. The normalized ensemble defect threshold was set to 0.01 and other parameters were set to defaults. The mean performance for ten calculations is shown.

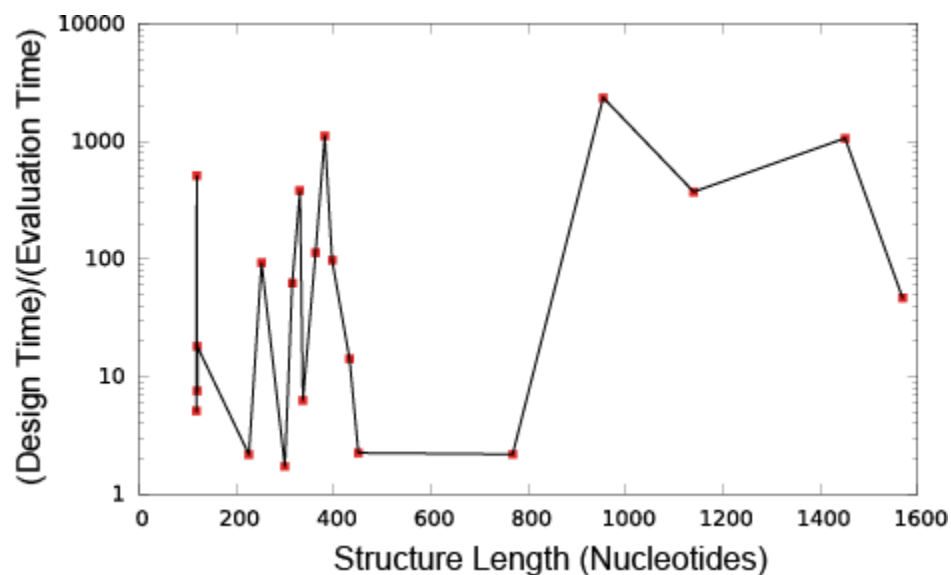

**Figure S10. Asymptotic convergence as a function of length of the ratio of design cost to design evaluation on natural RNA structures for NUPACK.** The thermodynamic parameters were rna1999 at 37 °C. The normalized ensemble defect threshold was set to 0.01 and other parameters were set to defaults. The mean performance for ten calculations is shown. The structures used here are those from Table S7, with the total time plotted in Figure S8.

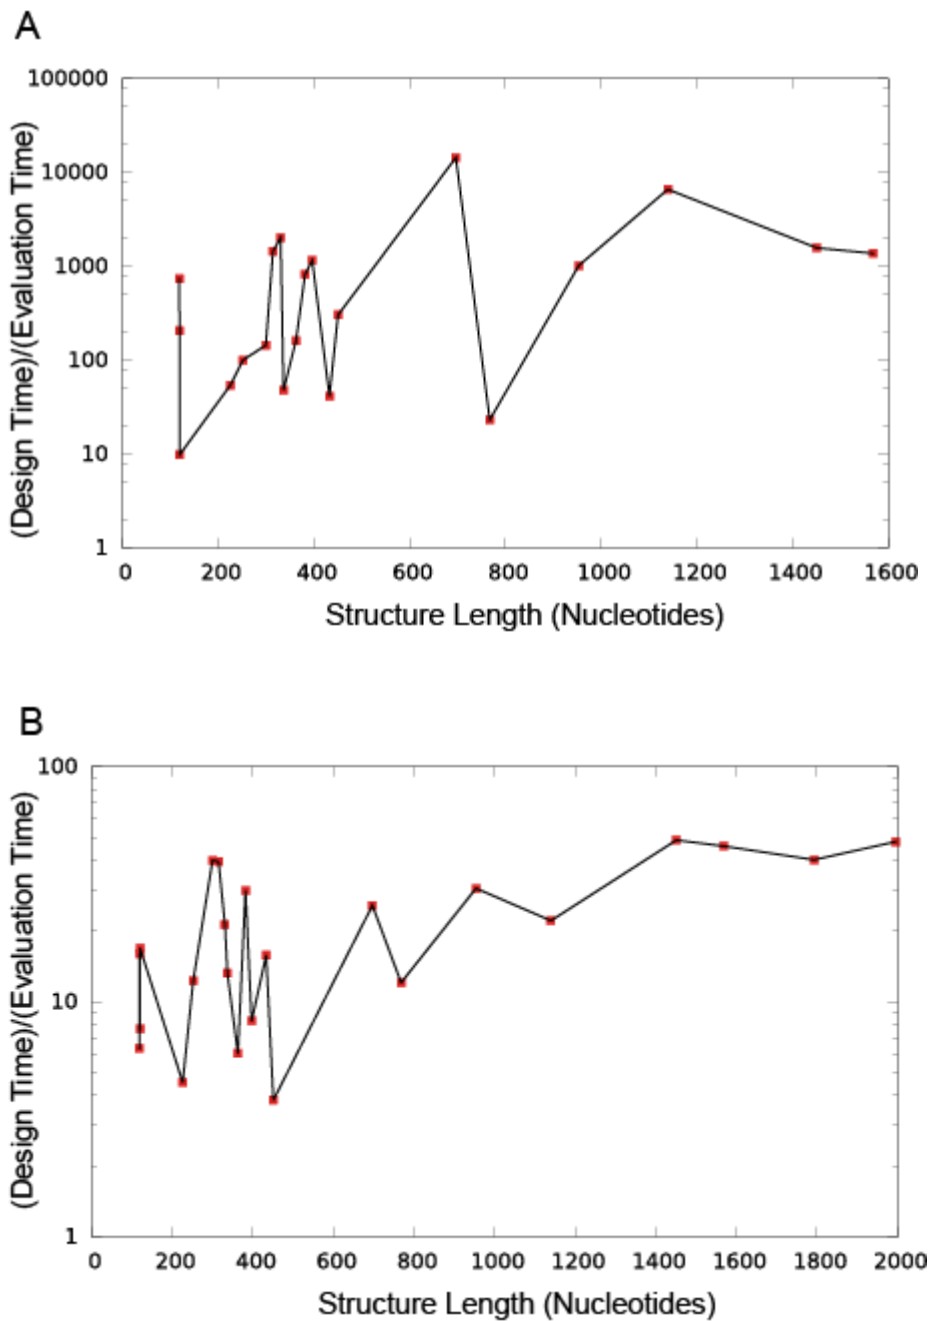

**Figure S11.** Asymptotic convergence as a function of length of the ratio of design cost to design evaluation on natural RNA structures for (Panel A) *Design\_Random* and (Panel B) *Design\_Preselected*. Parameters were set to default values. The mean performance for ten calculations is shown. The structures used here are those from Table S7, with the total time plotted in Figure S8.

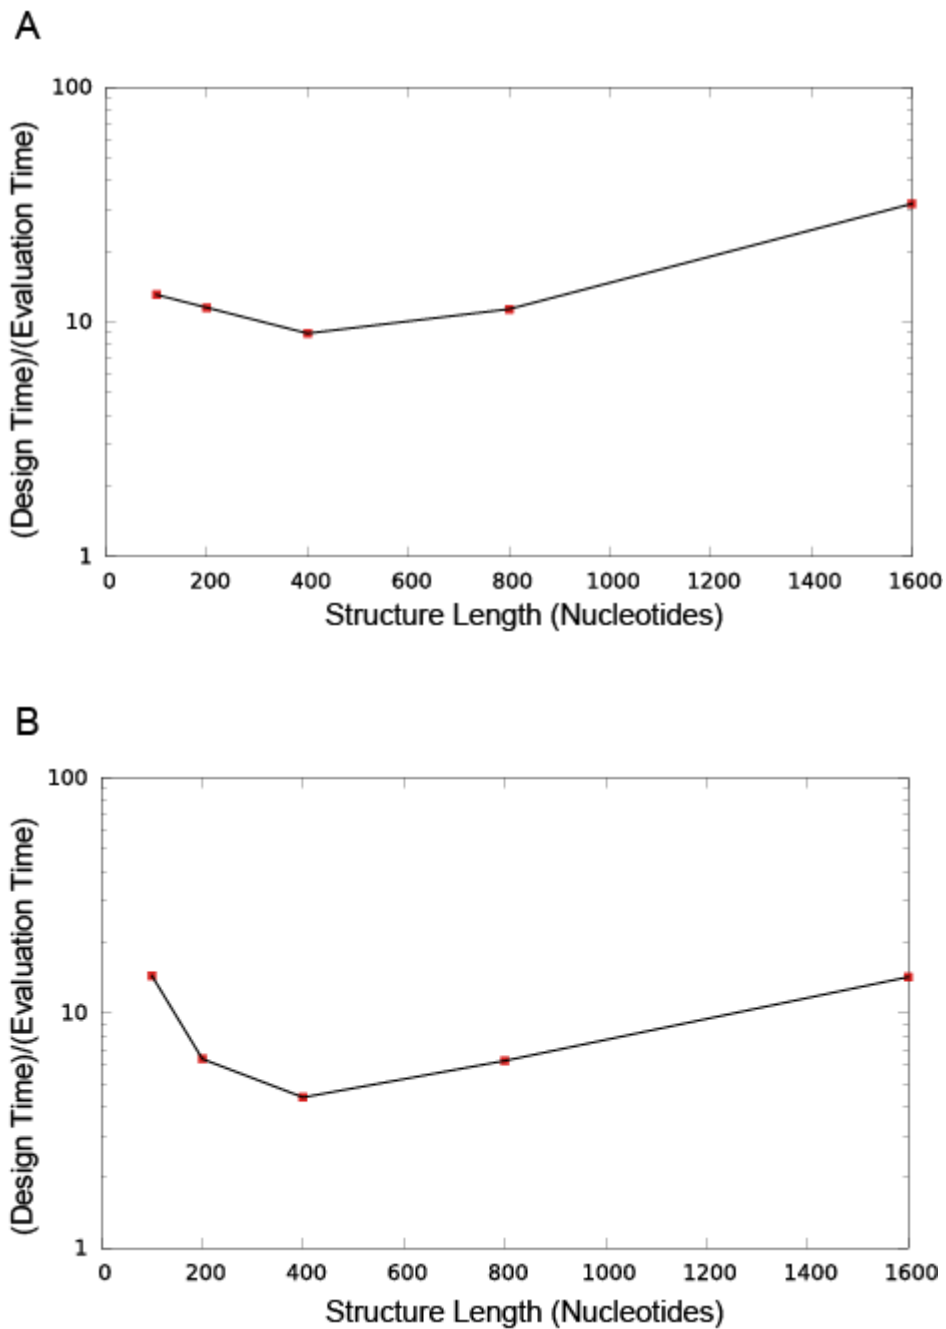

**Figure S12.** Asymptotic convergence as a function of length of the ratio of design cost to design evaluation on engineered RNA structures for (Panel A) *Design\_Random* and (Panel B) *Design\_Preselected*. Parameters were set to default values. The mean performance for ten calculations is shown. The structures used here are engineered structures provided by Zadeh et al. (2011b).

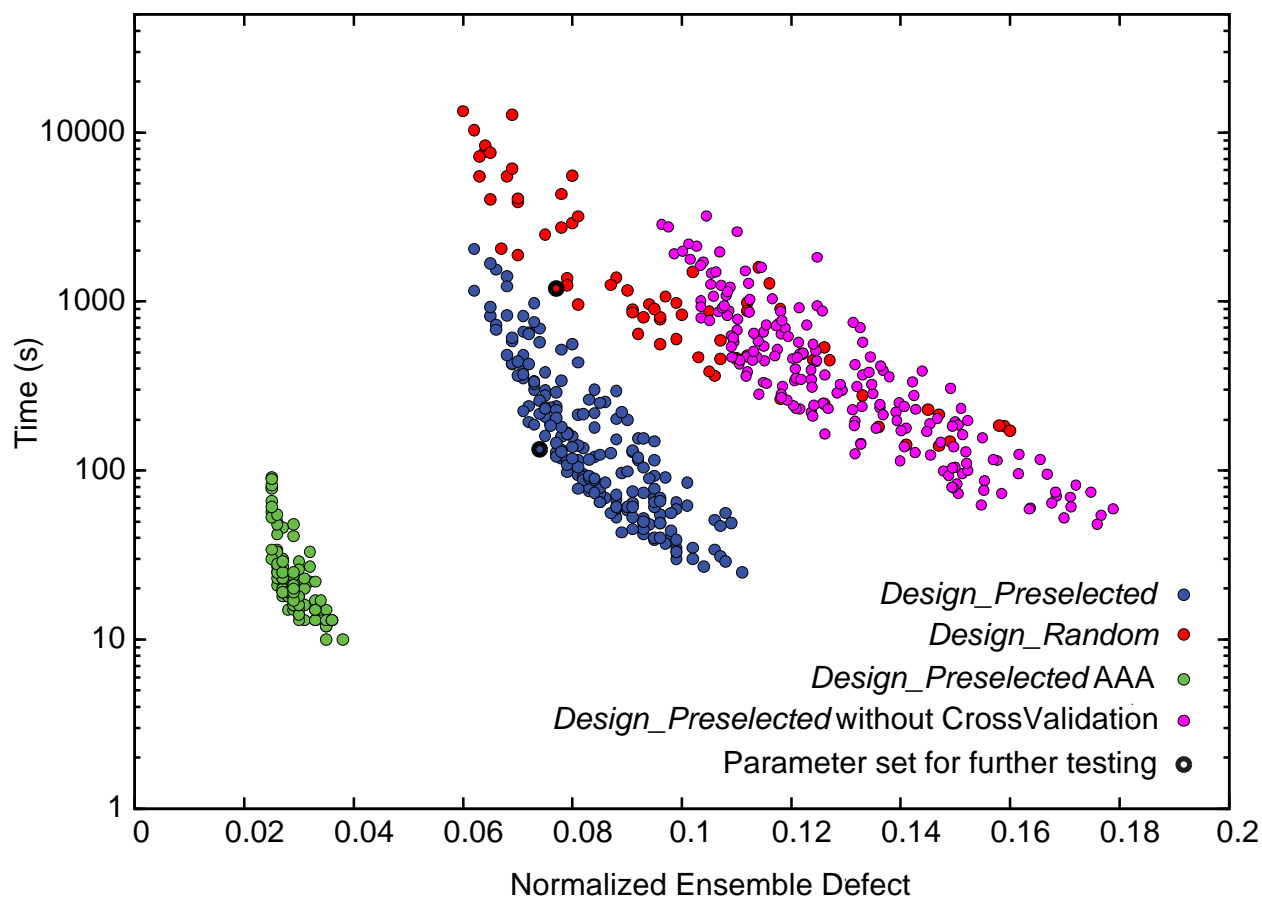

**Figure S13. Algorithm performance distribution across sets of parameters.** Blue and red dots represent performance of *Design* algorithm in *Preselected* and *Random* modes, respectively. Each dot is the mean for a set of parameters. Green shows the performance of the *Design* algorithm in *Preselected* mode using all Adenines in place of single stranded regions. These three results are shown in Figure 2. Purple dots show the performance of *Design* algorithm in *Preselected* mode using a database of helix and loop sequences randomly assembled from a pool of sequences remaining after the selection steps based on thermodynamics, thus not performing the cross-hybridization evaluation between the sequences. Performance is evaluated as mean time as a function of mean normalized ensemble defect.

Table S1. Randomly generated sequences for evaluation of parameter dependence.

| Number | Length (nt) | Sequence                                                                                                                                                                                                                                                                                                                                                                                          |
|--------|-------------|---------------------------------------------------------------------------------------------------------------------------------------------------------------------------------------------------------------------------------------------------------------------------------------------------------------------------------------------------------------------------------------------------|
| 1      | 64          | AGCUU AACGAGGGAUAGACGUUAGAAGUCACUGACUGUGUUAGAUGGUGCUGGGUCUACUAGGG                                                                                                                                                                                                                                                                                                                                 |
| 2      | 92          | GGUUAUGUAUUUAUACGACUCUAUUGCCUCACAUUAAUAAUAGCUCACCCCAAAUAGCGUCACCCUUAAGCGACCCGUCGUGAGUCUUUAAUA                                                                                                                                                                                                                                                                                                     |
| 3      | 104         | GGGUUUCUGAGAUAGUUUCAGAACTUUAUGCUUACUUGCCGCUUACAAGUUCUUAACGAAACCAGAAAGGAUUGGAGCGCCAGUUGAGCCUAGAGUAAGCGA                                                                                                                                                                                                                                                                                            |
| 4      | 118         | GCAACGUGAGCCGCCAUGUAUUAAGAGUCGGGGUUCGCUUUAUUUAAGUAUCAGGGGGACCUUACA AAUUUCCUAGA UUCAGAGAAUGCCUACAAACAGCCUAGCCAUUAGCGAUC                                                                                                                                                                                                                                                                            |
| 5      | 113         | AGGCAUUAUGCGCCUCAAUAUUAACCCACGACCUUAUGAUCGGUCUACAACAGGACUUGAAACGGGACACAAACGACAUUCGACGUUUUCUGCGAGUUCAAUUUCGACAGGCC                                                                                                                                                                                                                                                                                 |
| 6      | 256         | ACUCCACAAGAAUGGGCCAAUCCAGCGGUUCUCUAGCGAUUGCCAAACUUCGUCGCCUUAUCUGGGCGUUGAAAGCAAACUUAUUUUGACCCGUAAACUGUGCGAGCACA UUUUAUCUUCUCCCAAGUAGGAAUAAACAGCCAGGUAUUGCGACGGUCUCCAACCGCUUCUGUUGCGACAGCGGUAAACCACGAAAGACUGAAGUGUACCGCAGUCUUAUGACUUAGAACCUCUUAUUUUCGGG                                                                                                                                             |
| 7      | 360         | CGAACUCGGGUGUUGGUCGUCGGGUGUGUGGUGCAACCUCAUGUCAAAACUUCUUGCCGCGGUCUCCACACGGCUACGGAACAGCUCGAGCUCUAAGAUACUGAGCGUUGCCUAACGGAGUCCUGACUGGGCGCAAAGGAUUGCCUCAAUGUAGGGUCGAAUACUGGCUGGUAGACCCGACAGUAUCUUAACGUAUCGACAGCUCUCUAUAAUACACAUUUGUCGAAUAGACUGAAGCAUUCGCAUAGAGACCCUAGAGUCGCCUUGGGGCCUGCUACCGGGAAGCCAUUCGCUUAUCUAGAUUGCCUUAACUUGCGGUACAACGGAAAGGGCCCG                                                  |
| 8      | 361         | GAGCUACAGGUCGCUUUUCUUUUUACGCUUCACAGCAAUUUCCGGAAGUACCCUUGCGGGCCGCCAGAACGGGCAAGCGGGAGGAAGGGGACAGUAAGACCCCUAAGAUUUCGUGAACCGUCGCCGGAUCACAGGUUAUUAUUGGACGAGCAGAGAUUGCAUUAUGCAGUUAAGCAGCUAGUUAUGGGCGAAGGUCGACUCUGAUGGUUGAACGCUACUGAAUCUUGGGGACGGGCAUGAAGCCACUUCUGGGCCAUUAACUUGGCCAUCAAAGGUUUUUAACGCCAGAGUUUAUCGUGUGCCAGUCUUAUGAAGACAAGUAGGGUCGUUAGCUUUCUGGU                                             |
| 9      | 367         | CAACGCAUUAUCUAAUGCAAUCAUAGAAGUAAAUUUGCGGUAUCUUGAUCUGCGCAGAAUUGAAUACCCGGUAAUGCUUUUAAAGAACC CGGUACGCGGUCGACCCGAAUUGACCUUGGCCGAAUUAUUAGCUCACUAGAAGGUUGAGAAGUAGCUUCGCCAUCCUAGUAGAGGAUUUAGGCUUUCGCCGGGUAAAUUAAAUGCAACAACUCCGUGGCCGGAUCUACCGGCUCAUUGGGCGUAGUAGUUUAACACUCGAAAGUCUGAAUUUCGUGAUCUAAAAGUUCGCAUUUUACGUGCCUAGUUCGCUAAUUAAGAAUCCUUAAGGCCUUAUGCCUACCAAUAUUUGUC                                  |
| 10     | 368         | GGGAUUAUCCUCGAGCGAUUCGCGCAGAAUUCUAAGGCUAUCUACAACCGGAUGGCUACCAACCGCCCAACGGGUCUGUUAAGUUGCAUUGCGCAGAGCACGGGAUAGACGGACCGCGGACCUAGAAAUCAGUGAGACACAGUAUGGGUGUGCAGGACUCCAAAGUUCUUUAUUCUGCAUUAUAGAAAGACAUUAACAGAUACAGACAAAUUGCAGCGCGACGGUAGACUAACUCCA UUGUUGCAGCAGCUCGCACUUAUUGUUAUCACGGCACAUCGGCUAUAUUUAAGUUGAGGGAUAACA UUGUGUGCCGGGUGGCUACAUUGGUUCGUAUAAACCUUCGCGCAGAGUCC                               |
| 11     | 397         | CAUCGUGAAAUCCAAUUCGCUUAUCCCAAGAUAGGUUAUGCUUCAAGUAGCCGAGGAACCUGAACCAAUUGGCAGUACACAGAUUCUGAGGACUACAGGGGUGCACC AUUCGCUGACCCUUGAGGUCGAAAGAUUGUACGUUCCGCUUCCAACUUGGCACAACGAGGAAUUGGAGACUAACUUAACGAGGUAUCCGACCUUUGGUAGCAUUGUAAAACGUGGUGUAACGGUAACACACAUUCUGCGACCAUUCUGGUACAGAUUCGUAUCUCGGUUCGUGAUGUGUCUCCGUUGAUGGGCAGUAUCCCGUAAGGCAUAAGUUGGGGAUGGGUUCUUAUUGAC                                           |
| 12     | 431         | UAAAGCAGUUCGAGAGAUUGAUAGUCUGGUACUUCGUAACCCUUAUAGCAGUGGACCAUUCUAGUCAUAGACCAAACGGGGCGGCAGGAAACUACUAGUACCUUUUUCACUGAAUCCAGACCUAACGUACGCCUACGUUGCCAGUAACUUGCAGGACUUCGGACAGUUAACGCCUCCCAUCGCUUAUGGGCAUGCCAAUUCGCUUAUUUAAGCAAAGCGGUUGCGCUAUCGGCGCUUCAGUCGAGGUUAUAGGCUAUGACUACAGCAGUAUUUAACGGCAGGAGUUCUGUAGGAAGUUCGUUGAGAGUUCACUGGCCAGCGCUAUGCAUGCUAGGUUCAUACCGGACGUAUAGUAGUUUUUGAAGCGGAGACAGAAUAGAUUGCA |

Table S2. Randomly generated sequences for testing performance on one parameter set.

| Number | Length (nt) | Sequence                                                                                                                                                                                                                                                                                                                                                              |
|--------|-------------|-----------------------------------------------------------------------------------------------------------------------------------------------------------------------------------------------------------------------------------------------------------------------------------------------------------------------------------------------------------------------|
| 1      | 48          | AUGAGUGACGUAAUUGUCUUUUAUCGGAGUUUUUGUCCCCGUAAGAACUC                                                                                                                                                                                                                                                                                                                    |
| 2      | 54          | UUGCACAAAGGUACUGCAGCCUAAAGACGGUUCGGGUUAGCCUCUGUAGCCUAC                                                                                                                                                                                                                                                                                                                |
| 3      | 74          | AAGAUCGUAAGAUAUCCUGUAAUAAUAAACAACGAACUCUCUGAAAUGGGAACGAUCCAGACGUCACGGCUGAG                                                                                                                                                                                                                                                                                            |
| 4      | 61          | AUACGGAAUAAACAAGGCGAGGGUAGCCCCGACUGUAGGAGUAGGGUAUCGGACUGGAU                                                                                                                                                                                                                                                                                                           |
| 5      | 75          | CCGAUCCGCCGGAUCCUCAGGUCGGUAAUGCCGCUUUAACGGCGUGUGAUAGGGAACCAUGGCUCAGCAAUG                                                                                                                                                                                                                                                                                              |
| 6      | 75          | CCGGCACCCACCAGAAUACGUCUCGACUUGUUUUAUCCUAAUUUAUUUCCAGGUUACAGGCAGAACCCUCCUA                                                                                                                                                                                                                                                                                             |
| 7      | 76          | CUGCAUUGAAAUAACUCGCGUGCAUUUAGGGGGAGUGAGUUUACUUUCAUGCAGUAGUCCAUUGGAAUACCCUGUCG                                                                                                                                                                                                                                                                                         |
| 8      | 77          | GGUACUAAGUCCCGGCUAAUAGUAUAACUCCAAGGAGUUCAGACGCGGUUAGUACCACUGACUCCACCCCUAGUGU                                                                                                                                                                                                                                                                                          |
| 9      | 105         | GGGUGCGAGAUUGUUCGCAAGCAGUACCCACGUAACGCGUACGCUUUGUCACAUAGUGAGGGUUAGGGGAACCCUGCAU<br>GCCGUCUAGGGGUGGACCAGAAG                                                                                                                                                                                                                                                            |
| 10     | 110         | UUCUCAUGUUUCGUACAUACUAAUGCCAACUUGUCGGUCCGGACUCCGCUAGUUGUCUGGGGACUGGACAGCGCGU<br>GGAGAUUAGGGAAGCACCGCGUUUCCA                                                                                                                                                                                                                                                           |
| 11     | 118         | AAGGAUAAUUGAAUACCCACAUUGGCCUUGGCCGGUUAACCUGAUGUGACAUAACUACGACGGGAUGCUCUAAUCGCGGU<br>GCGUAAUGUGACAUCUCGGGAAACAGGCAAGGAGGU                                                                                                                                                                                                                                              |
| 12     | 119         | GCUUGAGCCCUCAUUCUCCUGUUUGGCAUACGUAGGCAUACUUCACGUGUCCUAAACGGCCGUAACUAGGAAACCCUA<br>UUCAGCAUUGACAUCGGUCGGAUUCUUAAGUUCUUGU                                                                                                                                                                                                                                               |
| 13     | 120         | CAAUUUCAUAUCGAACUGGGUUUACCAUCCUUGACCCGUGGCCGUGGAAUCAGAUCCUCCAGUUGUCACGUCUCCGCGGGG<br>GAAUGGUACGGACUCGAGUGGAGUUACCAACGAAAGACU                                                                                                                                                                                                                                          |
| 14     | 120         | CGUUGCCGUCGGCAUUGAUGAAAACAUUCGUCUCGACCACUCUAGUCAUCUGCCGAGUAAUUUGGACAGUGGGGGCGA<br>GCUAUGUUAAGUGUACAACCUUUUUGCGCCGCGCCGAACA                                                                                                                                                                                                                                            |
| 15     | 226         | CGACAGCAUAAACAGUUGCAGUUCGCGGGGUAAGCAGGAAGAGGUCCUGAGACCCAGGGAACCGCACAGUGGGCAUUC<br>UCCAGGACAGCCAGAGAAUGAUUCGUACGGAUUACGCGGUUUGUGGUAACUCUGGAAAUUAAACCUACUUCAGUGAG<br>AAGACCGAUAAUAGUCUCGGCUCAAGUGGGGUUAGGCCCCCCGUAUGCCAGCCUCAGUGAGCC                                                                                                                                    |
| 16     | 252         | UUAGUUGGAUUCACGUGACUCGUGUUUCCAGCUCUUAACAUGAAGAUCUAGCUCGAUUUGACGCAAUCUACUUAUAGG<br>UGUAAGGGUCCACUCGUUCGUCGACAAUCUAGUUUAAGACCCGGGGGCGACUCAGCUGUAUCUUAAAAGUCGUGACA<br>CUUCCAAAGAAUAGGAGGGGAGGCCUUGUAUUGGACAUUCGUUCGCGGGGUAAAGUCAAAUCUAGCUCGCGCGUGCA<br>GUAGGGACG                                                                                                         |
| 17     | 300         | UCCGGGCAAGCAGCUCUUGCUGAUCCAGCGCAACGAAGACGACUUAAGGUGGGGAGCCCGUGGAAGUGGUUGCUAGUACCU<br>CUCACCCCCACAGAUUGGCGUAAAUGGCCGCUUUUUGGCAUACACGCUUGAGGUAACUGAAGGAAUGUCGACCGGU<br>CCAAGUUAAAUCGAGAUAGUUGCCUAAUCAAAUAGCGGGUCUGAGAUCUUAACCCGACGGGUCUCCUGGGCUGCCU<br>UUUAGCGGAUCUUUAUGCGCAAUGAUGGGUUCGGGAUCAAUGUCGAUUGGCCA                                                            |
| 18     | 315         | GCGCUGAGUAUAACCCAUGAGGCUAGCGAUGUGUUCCGUGCAGUUCGAAUCACGUUGCCAAUUCUCCGUCUCUGGUUACCU<br>AGCAGUGGUACAUCAGUUCUUAUGCGGACUAGUUUGCCUAAACACGCGCCGCCACACCUUCCUAGCCAUUCUGUCAAUG<br>ACAAUCGGUCCAUUAGCACUACAACGAGCUACUUCUAGCAGUUCUCCAGUGCAUUCUUGGCUUUCAAAGUGGACCU<br>CCGUCGCCAGAAAGUUUCAAUAGCGGAUUGGCAUACAUAACAUGGUUACGCUUCUUAUUUUAAACA                                            |
| 19     | 331         | ACUGCUCUUUCCCUAUAACAGGAGGUUCGGGCAUCGUACGCUUAUGAUGACAUAUAGCCUAGAGUCUAUAUUCGCGG<br>AGUAGGUGACUCCGACCUAGUAGUUCACGGUGAGUGAGCCUAGAUGGAGGGCGAACCCGAUGGUAACCCAGGUUAAGUGGCA<br>AGGCGUUCGUGUCCAGUCGUGAUGGGAUAACCGGACUUGGUAUGGUGUACUACUUCACUGCAUAGGAGGGAAC<br>AUACCCACGUUAACGGGUCUCCUAGACUACACGCUACUUCGUUACGCAUUGUUAUAUACUCUCUGCAGACUGAGUC<br>CAGCUAA                           |
| 20     | 337         | UGCAAUCUAAAGGUUCGUGAGAGUAGUUGGAAUAAAACAGUACAGAUUUAGUUCGGUGCAGAAGAACCACCCUG<br>ACCACUUAAGUAAAAGAACACUGGAUUCAGUCUACAUACAGAAGAACAAGACCGUCCGUGAGUUUAAAGACGUCGCGGCUA<br>CA                                                                                                                                                                                                 |
| 21     | 366         | UUUAAACCCGUUUUCUGAGAGUUGGCAUAAAGCGACCCACUGUAGCCACCGGUGGGGCGGGAUGGGCAGGUAAGGA<br>CUUGAGUUGUCGCGAGAACUCGUCCUCCAGACCCCGCAUAACACGAGCAUUGGAUACACUCGUAUUAAACAACACCC<br>GACCGUGGAGUGCUAGCUUCAAGCAAGUUCUGUGGACUAGCAGGACCUAAUUAUCGUCUCUUCGCGACGAAAUAAA<br>UUUCUGUAGGAUACUCUAACCGUGCAGUAGCGGUAUUCUGAAGCACAAUUCAGCAGUUGCUUAGUCUGAUCACCG<br>CGUAGGAUGGGCAUUAUCCCGGACUGGGCUCGUAACC |



|    |     |                                                                                                                                                                                                                                                                                                                                                                                                                                                                              |
|----|-----|------------------------------------------------------------------------------------------------------------------------------------------------------------------------------------------------------------------------------------------------------------------------------------------------------------------------------------------------------------------------------------------------------------------------------------------------------------------------------|
| 22 | 382 | UGCAACAGGCACUCGUGCGGAGCGGUCUAUAGAUUAUUCAUUAGUCUCAUCGCUUCUUGAGGACUCAGUAUUAUCGGGG<br>GCCCACUACCUCUGGGGGAUAUCCCCAACGUAGUGGUCUGAGAUACGAUCUCCACUUGAAAUGUAGAGACAACAGGUAAC<br>UCAACCGGGGGUUCACACUGUUGGCUCUUAAGAGCGAGAGACCUACCAAAGAAGAACUUGGAACUGUCCAGCAGAGGAA<br>AAAUUCUCGGACUUGACAUCUCGGUUAUUGCCAUACUGUUCUCGGAACAGACAAGAGGUGACGGUUGCCGGAUACGGGU<br>AUACACUAGGUGCGAUACCCUGGGAUCGUUUUGCCAGGGCGCGGAUUAACCCG                                                                           |
| 23 | 397 | AAGCAGCUGGCAUGCCUACCGCAUUGACUUGUAGGUCUGAUUACUAGGACUUCGCAUGACACGUAUGAUUUGGCC<br>UCUAAUUUUACCAGUGAGACACUAGUUCAAUUAUGGCACCCGCGGAGGUGCGGUGCGGACCAAGGCCUAGUUGUUGGAA<br>UCAACAACCCACCUUUCUGGAUGCGAAUACUCCGAACUCGGGUGUCGCGCAUAGACCCUCGUUUCGCUUUCGCGAA<br>UCAAGGGCUUCUAAUUAACAGCGUGAUGGCCGAUAAUUAAGUACCCACAGGAGGAACACGAAUUGCGGAAUUAUCGCUGA<br>UCUAAAUUUUGCCAAGAAUCCUGCGGGUUAUUAUUAAGCCCGUUCGACGAGAACUCGGCGUUAACCCA                                                                   |
| 24 | 433 | UUCUUCUCAAUAGGCAUCCAUUCGCGUCCACCUUGGAGAGUCGUUAGAAGAAGGUGGCAUCGCUACACGCUGACAUUU<br>UAGAAUGGCACUUAUCCGUACGCCAAUAGCCUAGUGGUAACUCCACUGCCCUAAUUCUCAGAUAAAUGAACGCAUCAG<br>CCCGUUUCGGCUGGAUGCUGAUUUUAAGCAGGGCGCGGUUGCCUGAGCCGGAGCAUCCGCGGAUCAAUUGCGGUUGC<br>UGGCAAGAUUAGCUGCCACCGUUCUUAUGGUAUCUGUAACCGGGCGGCCACGCACAUUCAAGUCUACCCCUACGAG<br>UAUAGUUCCUAGAAGCCAAGAAUACUCUCCCGCUAUUAGGCCCGUCCGACAGCUCGUAAGCCCGUGCCCGCAAGAUAA<br>UUACUGGAUAGACGCUUCAGCUAGUUA                           |
| 25 | 451 | CCUGGGUGCGCGUGCGAGUAGAGAAGAAUACCGUUCUUUGGUGGAAGGUAGGACAGGUCAAAUCGGCGAAUAGAUU<br>GAAUUCGAUGCUAUUAUACAGUCUCAGUAAUAGCCACGCGAGGGUGCUUAGAUGUUUUCGCUACAUAGAAAUUUCGC<br>GUUCACAACGUGCUGCGUCAGAAAGUGUAGUUUACCGCAGGAGGCGCAGUUAUUAAGCAGGGCGGGCUCCUUCGAGUU<br>GGGAAAAGGUCAUACAGACCUUGAGGAGUUCGGACCGACUAAAGUUGCUGCGCGUUGAACACGACAGGAGCUAUGCAGCAG<br>UAUUCGCAACGAGUACUUGAUUGACAACUCGAGCGUCUAGCUUGGCAGUGGAUGGUGGGUUAGGAACUAGAGUACUUAU<br>CUCGCAUCGCUAUAGCCGAAGACGGCCUAAUCGCAUGGAGUUGACAGGG |

Table S3. Performance comparison between two modes for natural sequences, using median NED and median time.

| Names                                          | Length     | <i>Design_Preselected</i> |                 | <i>Design_Random</i> |                 |
|------------------------------------------------|------------|---------------------------|-----------------|----------------------|-----------------|
|                                                |            | Median NED                | Median Time (s) | Median NED           | Median Time (s) |
| <i>Schistosoma haematobium</i> <sup>1</sup>    | 48         | 0.12±0.025                | 1±0             | 0.19±0.026           | 14±3            |
| <i>Peach latent mosaic viroid</i> <sup>2</sup> | 54         | 0.02±0.005                | 1±1             | 0.03±0.018           | 2±1             |
| synthetic construct <sup>3</sup>               | 61         | 0.19±0.020                | 0±0             | 0.14±0.000           | 71±4            |
| <i>Saccharomyces cerevisiae</i> <sup>4</sup>   | 74         | 0.03±0.009                | 1±0             | 0.02±0.004           | 2±1             |
| <i>Gallus gallus domesticus</i> <sup>5</sup>   | 75         | 0.02±0.011                | 0±0             | 0.03±0.013           | 3±1             |
| <i>Galago senegalensis</i> <sup>6</sup>        | 75         | 0.00±0.001                | 0±0             | 0.01±0.002           | 5±1             |
| <i>Nicotiana rustica</i> <sup>7</sup>          | 76         | 0.04±0.013                | 0±0             | 0.02±0.009           | 3±1             |
| <i>Mycoplasma mycoides</i> <sup>8</sup>        | 77         | 0.05±0.003                | 0±0             | 0.03±0.001           | 8±5             |
| <i>Thermus thermophilus</i> <sup>8</sup>       | 105        | 0.09±0.006                | 4±0             | 0.03±0.001           | 294±85          |
| <i>Homo sapiens</i> <sup>6</sup>               | 110        | 0.00±0.001                | 0±0             | 0.01±0.001           | 28±4            |
| <i>Stilbum vulgare</i> <sup>9</sup>            | 118        | 0.07±0.007                | 2±0             | 0.02±0.002           | 39±16           |
| <i>Avocado sunblotch viroid</i> <sup>1</sup>   | 119        | 0.17±0.009                | 5±3             | 0.10±0.049           | 302±14          |
| <i>Methanococcus vannielii</i> <sup>9</sup>    | 120        | 0.07±0.004                | 2±0             | 0.04±0.010           | 56±23           |
| <i>Streptomyces griseus</i> <sup>9</sup>       | 120        | 0.07±0.011                | 5±2             | 0.03±0.009           | 62±25           |
| <i>Homo sapiens</i> <sup>3</sup>               | 226        | 0.09±0.011                | 8±2             | 0.07±0.001           | 91±24           |
| <i>Anabaena</i> <sup>10</sup>                  | 252        | 0.06±0.002                | 29±20           | 0.12±0.061           | 217±59          |
| <i>Homo sapiens A</i> <sup>8</sup>             | 300        | 0.06±0.004                | 148±74          | 0.04±0.003           | 497±323         |
| <i>Sulfolobus acidocaldarius</i> <sup>11</sup> | 315        | 0.09±0.005                | 198±32          | 0.06±0.014           | 9223±1179       |
| <i>Homo sapiens</i> <sup>12</sup>              | 331        | 0.18±0.033                | 160±13          | 0.19±0.033           | 9896±7412       |
| <i>Escherichia coli</i> <sup>13</sup>          | 337        | 0.06±0.014                | 85±27           | 0.06±0.031           | 316±62          |
| <i>Escherichia coli</i> <sup>14</sup>          | 363        | 0.04±0.007                | 51±15           | 0.11±0.014           | 1362±369        |
| <i>Streptomyces aureofaciens</i> <sup>14</sup> | 382        | 0.05±0.011                | 294±158         | 0.15±0.041           | 8047±1818       |
| <i>Mus spretus</i> <sup>15</sup>               | 397        | 0.07±0.005                | 50±22           | 0.13±0.028           | 10860±2349      |
| <i>Tetrahymena thermophila</i> <sup>10</sup>   | 433        | 0.06±0.011                | 255±94          | 0.09±0.026           | 528±142         |
| <i>Oryctolagus cuniculus</i> <sup>15</sup>     | 451        | 0.06±0.003                | 49±9            | 0.04±0.007           | 4122±2322       |
| <b>Natural Structure Average</b>               | <b>201</b> | <b>0.07</b>               | <b>54</b>       | <b>0.07</b>          | <b>1842</b>     |

All calculations were run on a cluster with 24 dual processors, six core Opteron 2427 nodes. Error estimates are median absolute deviations. <sup>1</sup>hammerhead ribozyme type I; <sup>2</sup>hammerhead ribozyme type III; <sup>3</sup>hairpin ribozyme; <sup>4</sup>tRNA<sup>ACG</sup>; <sup>5</sup>tRNA<sup>BCA</sup>, where "B" represents 2'-O-methylcytidine; <sup>6</sup>Y RNA; <sup>7</sup>tRNA<sup>GPA</sup>, where "P" represents pseudouridine; <sup>8</sup>SRP RNA; <sup>9</sup>5S RNA; <sup>10</sup>group I intron; <sup>11</sup>RNase P; <sup>12</sup>7SK RNA; <sup>13</sup>RNase E 5' UTR; <sup>14</sup>tmRNA; <sup>15</sup>telomerase RNA.

Table S4. Performance comparison between two modes for random sequences.

| Names                           | Length     | <i>Design_Preselected</i> |                 | <i>Design_Random</i> |                 |
|---------------------------------|------------|---------------------------|-----------------|----------------------|-----------------|
|                                 |            | Median NED                | Median Time (s) | Median NED           | Median Time (s) |
| Sequence 1                      | 48         | 0.11±0.021                | 0±0             | 0.04±0.011           | 5±1             |
| Sequence 2                      | 54         | 0.12±0.026                | 0±0             | 0.01±0.000           | 1±1             |
| Sequence 3                      | 61         | 0.10±0.055                | 1±0             | 0.21±0.091           | 11±2            |
| Sequence 4                      | 74         | 0.05±0.010                | 2±1             | 0.03±0.002           | 11±7            |
| Sequence 5                      | 75         | 0.04±0.005                | 1±0             | 0.05±0.018           | 9±4             |
| Sequence 6                      | 75         | 0.08±0.020                | 1±1             | 0.01±0.001           | 5±3             |
| Sequence 7                      | 76         | 0.04±0.012                | 1±0             | 0.02±0.003           | 1±0             |
| Sequence 8                      | 77         | 0.05±0.008                | 2±1             | 0.02±0.005           | 5±3             |
| Sequence 9                      | 105        | 0.06±0.006                | 13±6            | 0.04±0.011           | 53±28           |
| Sequence 10                     | 110        | 0.13±0.033                | 1±0             | 0.01±0.001           | 12±4            |
| Sequence 11                     | 118        | 0.07±0.006                | 14±6            | 0.03±0.003           | 55±20           |
| Sequence 12                     | 119        | 0.08±0.012                | 2±1             | 0.02±0.007           | 23±5            |
| Sequence 13                     | 120        | 0.06±0.009                | 27±11           | 0.03±0.013           | 25±16           |
| Sequence 14                     | 120        | 0.08±0.012                | 1±0             | 0.03±0.004           | 30±10           |
| Sequence 15                     | 226        | 0.07±0.009                | 19±10           | 0.01±0.002           | 106±44          |
| Sequence 16                     | 252        | 0.05±0.006                | 15±5            | 0.03±0.003           | 67±31           |
| Sequence 17                     | 300        | 0.08±0.011                | 34±6            | 0.03±0.007           | 306±105         |
| Sequence 18                     | 315        | 0.06±0.011                | 368±142         | 0.03±0.010           | 629±309         |
| Sequence 19                     | 331        | 0.07±0.012                | 142±80          | 0.01±0.002           | 537±176         |
| Sequence 20                     | 337        | 0.11±0.010                | 257±103         | 0.05±0.036           | 2346±589        |
| Sequence 21                     | 363        | 0.09±0.013                | 357±268         | 0.03±0.001           | 1494±665        |
| Sequence 22                     | 382        | 0.05±0.003                | 57±28           | 0.03±0.007           | 238±141         |
| Sequence 23                     | 397        | 0.05±0.006                | 438±197         | 0.04±0.006           | 789±271         |
| Sequence 24                     | 433        | 0.06±0.004                | 518±310         | 0.03±0.002           | 5435±1584       |
| Sequence 25                     | 451        | 0.06±0.002                | 236±131         | 0.03±0.001           | 1295±571        |
| <b>Random Structure Average</b> | <b>201</b> | <b>0.07</b>               | <b>100</b>      | <b>0.03</b>          | <b>539</b>      |

All calculations were run on a cluster with 24 dual processors, six core Opteron 2427 nodes.

Table S5. NUPACK Performance comparison for natural sequences.

| Names                                          | Length     | NUPACK      |             | Design_Random |             |
|------------------------------------------------|------------|-------------|-------------|---------------|-------------|
|                                                |            | Mean        | Mean        | Median        | Median      |
|                                                |            | NED         | Time (s)    | NED           | Time (s)    |
| <i>Schistosoma haematobium</i> <sup>1</sup>    | 48         | 0.09±0.006  | 2±1         | 0.09±0.005    | 1±0         |
| <i>Peach latent mosaic viroid</i> <sup>2</sup> | 54         | 0.08±0.013  | 0±0         | 0.08±0.009    | 0±0         |
| synthetic construct <sup>3</sup>               | 61         | 0.11±0.001  | 2±2         | 0.11±0.001    | 1±0         |
| <i>Saccharomyces cerevisiae</i> <sup>4</sup>   | 74         | 0.09±0.009  | 1±1         | 0.10±0.003    | 1±0         |
| <i>Gallus gallus domesticus</i> <sup>5</sup>   | 75         | 0.09±0.010  | 2±2         | 0.09±0.004    | 1±1         |
| <i>Galago senegalensis</i> <sup>6</sup>        | 75         | 0.08±0.016  | 2±1         | 0.09±0.009    | 2±0         |
| <i>Nicotiana rustica</i> <sup>7</sup>          | 76         | 0.09±0.014  | 3±2         | 0.09±0.007    | 3±1         |
| <i>Mycoplasma mycoides</i> <sup>8</sup>        | 77         | 0.08±0.016  | 2±1         | 0.09±0.013    | 2±1         |
| <i>Thermus thermophilus</i> <sup>8</sup>       | 105        | 0.08±0.014  | 1±0         | 0.08±0.013    | 1±0         |
| <i>Homo sapiens</i> <sup>6</sup>               | 110        | 0.08±0.011  | 15±12       | 0.08±0.007    | 12±3        |
| <i>Stilbum vulgare</i> <sup>9</sup>            | 118        | 0.08±0.013  | 3±2         | 0.09±0.009    | 3±1         |
| <i>Avocado sunblotch viroid</i> <sup>1</sup>   | 119        | 0.15±0.042  | 334±184     | 0.14±0.028    | 298±106     |
| <i>Methanococcus vannielii</i> <sup>9</sup>    | 120        | 0.09±0.010  | 5±3         | 0.09±0.005    | 4±2         |
| <i>Streptomyces griseus</i> <sup>9</sup>       | 120        | 0.10±0.005  | 12±13       | 0.10±0.002    | 9±6         |
| <i>Homo sapiens</i> <sup>3</sup>               | 226        | 0.09±0.006  | 12±1        | 0.09±0.002    | 11±1        |
| <i>Anabaena</i> <sup>10</sup>                  | 252        | 0.09±0.009  | 708±857     | 0.09±0.008    | 427±306     |
| <i>Homo sapiens A</i> <sup>8</sup>             | 300        | 0.09±0.007  | 22±4        | 0.08±0.003    | 22±2        |
| <i>Sulfolobus acidocaldarius</i> <sup>11</sup> | 315        | 0.09±0.016  | 931±614     | 0.10±0.004    | 940±468     |
| <i>Homo sapiens</i> <sup>12</sup>              | 331        | 0.10±0.009  | 6668±5563   | 0.10±0.007    | 5707±4523   |
| <i>Escherichia coli</i> <sup>13</sup>          | 337        | 0.08±0.007  | 119±85      | 0.08±0.003    | 103±52      |
| <i>Escherichia coli</i> <sup>14</sup>          | 363        | 0.08±0.004  | 2594±2224   | 0.08±0.003    | 2474±2174   |
| <i>Streptomyces aureofaciens</i> <sup>14</sup> | 382        | 0.09±0.005  | 30073±31219 | 0.09±0.003    | 23490±20550 |
| <i>Mus spretus</i> <sup>15</sup>               | 397        | 0.10±0.013  | 2936±1685   | 0.09±0.003    | 2742±1110   |
| <i>Tetrahymena thermophila</i> <sup>10</sup>   | 433        | 0.08±0.009  | 601±345     | 0.08±0.006    | 552±117     |
| <i>Oryctolagus cuniculus</i> <sup>15</sup>     | 451        | 0.08±0.007  | 106±47      | 0.08±0.004    | 84±11       |
| <b>Natural Structure Average</b>               | <b>201</b> | <b>0.09</b> | <b>1806</b> | <b>0.09</b>   | <b>1476</b> |

All calculations were run on a cluster with 24 dual processors, six core Opteron 2427 nodes. NUPACK calculations were run using the Turner99 energy model at 37 °C. The target NED threshold was set to 0.10 and other parameters were set to defaults. For Design\_Random, the parameters were set to defaults. These parameter choices were made so that the final performance of the programs for NED would be similar to facilitate the comparison of time performance. Error estimates for means are standard deviations and error estimates for medians are median absolute deviations. <sup>1</sup>hammerhead ribozyme type I; <sup>2</sup>hammerhead ribozyme type III; <sup>3</sup>hairpin ribozyme; <sup>4</sup>tRNA<sup>ACG</sup>; <sup>5</sup>tRNA<sup>BCA</sup>, where "B" represents 2'-O-

methylcytidine; <sup>6</sup> Y RNA; <sup>7</sup> tRNA<sup>GPA</sup>, where "P" represents pseudouridine; <sup>8</sup> SRP RNA; <sup>9</sup> 5S RNA; <sup>10</sup> group I intron; <sup>11</sup> RNase P; <sup>12</sup> 7SK RNA; <sup>13</sup> RNase E 5' UTR; <sup>14</sup> tmRNA; <sup>15</sup> telomerase RNA.

Table S6. NUPACK Performance comparison for random sequences.

| Names                           | Length     | <i>NUPACK</i> |               | <i>Design_Random</i> |                 |
|---------------------------------|------------|---------------|---------------|----------------------|-----------------|
|                                 |            | Mean NED      | Mean Time (s) | Median NED           | Median Time (s) |
| Sequence 1                      | 48         | 0.09±0.006    | 1±1           | 0.09±0.002           | 1±0             |
| Sequence 2                      | 54         | 0.08±0.019    | 0±0           | 0.09±0.009           | 0±0             |
| Sequence 3                      | 61         | 0.09±0.006    | 10±7          | 0.09±0.005           | 10±5            |
| Sequence 4                      | 74         | 0.09±0.009    | 3±2           | 0.09±0.005           | 3±1             |
| Sequence 5                      | 75         | 0.11±0.071    | 3±2           | 0.09±0.008           | 2±2             |
| Sequence 6                      | 75         | 0.07±0.014    | 0±0           | 0.07±0.009           | 0±0             |
| Sequence 7                      | 76         | 0.07±0.016    | 0±0           | 0.07±0.009           | 0±0             |
| Sequence 8                      | 77         | 0.09±0.009    | 8±6           | 0.09±0.008           | 6±3             |
| Sequence 9                      | 105        | 0.09±0.008    | 6±6           | 0.10±0.002           | 4±1             |
| Sequence 10                     | 110        | 0.06±0.012    | 1±0           | 0.06±0.007           | 1±0             |
| Sequence 11                     | 118        | 0.08±0.012    | 3±1           | 0.08±0.009           | 2±1             |
| Sequence 12                     | 119        | 0.08±0.017    | 4±3           | 0.08±0.012           | 2±1             |
| Sequence 13                     | 120        | 0.07±0.016    | 2±1           | 0.07±0.014           | 2±1             |
| Sequence 14                     | 120        | 0.07±0.012    | 3±2           | 0.07±0.011           | 3±0             |
| Sequence 15                     | 226        | 0.08±0.006    | 15±3          | 0.08±0.005           | 15±2            |
| Sequence 16                     | 252        | 0.08±0.009    | 15±6          | 0.08±0.008           | 12±1            |
| Sequence 17                     | 300        | 0.08±0.009    | 82±52         | 0.08±0.006           | 64±39           |
| Sequence 18                     | 315        | 0.09±0.007    | 137±62        | 0.09±0.005           | 116±18          |
| Sequence 19                     | 331        | 0.08±0.008    | 40±13         | 0.08±0.008           | 35±4            |
| Sequence 20                     | 337        | 0.08±0.011    | 143±93        | 0.08±0.007           | 138±92          |
| Sequence 21                     | 363        | 0.09±0.008    | 83±40         | 0.09±0.005           | 77±28           |
| Sequence 22                     | 382        | 0.08±0.010    | 130±83        | 0.07±0.006           | 107±42          |
| Sequence 23                     | 397        | 0.09±0.006    | 103±47        | 0.08±0.003           | 94±35           |
| Sequence 24                     | 433        | 0.08±0.007    | 75±14         | 0.08±0.005           | 73±8            |
| Sequence 25                     | 451        | 0.09±0.010    | 112313±1      | 0.08±0.004           | 46212±44593     |
| <b>Random Structure Average</b> | <b>201</b> | <b>0.08</b>   | <b>4527</b>   | <b>0.08</b>          | <b>1879</b>     |

All calculations were run on a cluster with 24 dual processors, six core Opteron 2427 nodes. NUPACK calculations were run using the Turner99 energy model at 37 °C. The target NED threshold was set to 0.10 and other parameters were set to defaults. For Design\_Random, the parameters were set to defaults. These parameter choices were made so that the final performance of the programs for NED would be similar to facilitate the comparison of time performance.

Table S7. Structures used for long structure benchmarks.

| Index | Length | Species                                          | RNA family                                                     |
|-------|--------|--------------------------------------------------|----------------------------------------------------------------|
| 1     | 48     | <i>Schistosoma haematobium</i>                   | hammerhead ribozyme type I                                     |
| 2     | 54     | Peach latent mosaic viroid                       | hammerhead ribozyme type III                                   |
| 3     | 61     | synthetic construct                              | hairpin ribozyme                                               |
| 4     | 74     | <i>Saccharomyces cerevisiae</i>                  | tRNA <sup>ACG</sup>                                            |
| 5     | 75     | <i>Gallus gallus domesticus</i>                  | tRNA <sup>BCA</sup> , where "B" represents 2'-O-methylcytidine |
| 6     | 75     | <i>Galago senegalensis</i>                       | Y RNA                                                          |
| 7     | 76     | <i>Nicotiana rustica</i>                         | tRNA <sup>GPA</sup> , where "P" represents pseudouridine       |
| 8     | 77     | <i>Mycoplasma mycoides</i>                       | SRP RNA                                                        |
| 9     | 105    | <i>Thermus thermophilus</i>                      | SRP RNA                                                        |
| 10    | 110    | <i>Homo sapiens</i>                              | Y RNA                                                          |
| 11    | 118    | <i>Stilbum vulgare</i>                           | 5S RNA                                                         |
| 12    | 119    | Avocado sunblotch viroid                         | hammerhead ribozyme type I                                     |
| 13    | 120    | <i>Methanococcus vannielii</i>                   | 5S RNA                                                         |
| 14    | 120    | <i>Streptomyces griseus</i>                      | 5S RNA                                                         |
| 15    | 226    | <i>Homo sapiens</i>                              | hairpin ribozyme                                               |
| 16    | 252    | <i>Anabaena</i>                                  | group I intron                                                 |
| 17    | 300    | <i>Homo sapiens A</i>                            | SRP RNA                                                        |
| 18    | 315    | <i>Sulfolobus acidocaldarius</i>                 | RNase P                                                        |
| 19    | 331    | <i>Homo sapiens</i>                              | 7SK RNA                                                        |
| 20    | 337    | <i>Escherichia coli</i>                          | RNase E 5' UTR                                                 |
| 21    | 363    | <i>Escherichia coli</i>                          | tmRNA                                                          |
| 22    | 382    | <i>Streptomyces aureofaciens</i>                 | tmRNA                                                          |
| 23    | 397    | <i>Mus spretus</i>                               | telomerase RNA                                                 |
| 24    | 433    | <i>Tetrahymena thermophila</i>                   | group I intron                                                 |
| 25    | 451    | <i>Oryctolagus cuniculus</i>                     | telomerase RNA                                                 |
| 26    | 697    | <i>Caenorhabditis elegans</i> (mitochondrial)    | 16S RNA                                                        |
| 27    | 768    | <i>Saccharomyces cerevisiae B1</i>               | group II intron                                                |
| 28    | 954    | <i>Homo sapiens</i> (mitochondrial)              | 16S RNA                                                        |
| 29    | 1140   | <i>Chlamydomonas reinhardtii</i> (mitochondrial) | 16S RNA                                                        |
| 30    | 1451   | <i>Giardia intestinalis</i>                      | 16S RNA                                                        |
| 31    | 1569   | <i>Aquifex pyrophilus</i>                        | 16S RNA                                                        |
| 32    | 1793   | <i>Toxoplasma gondii</i>                         | 16S RNA                                                        |
| 33    | 1995   | <i>Drosophila melanogaster</i>                   | 16S RNA                                                        |

Table S8. Statistics for the overlap of the pre-selected helix database and the known helix database (for unique helices and for all helices).

| <b>Helix Size (nt)</b>                                                                                                                                                                                                                                                                                                                                                                                                                                                                                       | <b>Unique Helix Overlap</b> | <b>Unique Helix Count</b> | <b>Helices in Assembled Database</b> | <b>Percent Unique Helix Overlap</b> |
|--------------------------------------------------------------------------------------------------------------------------------------------------------------------------------------------------------------------------------------------------------------------------------------------------------------------------------------------------------------------------------------------------------------------------------------------------------------------------------------------------------------|-----------------------------|---------------------------|--------------------------------------|-------------------------------------|
| 2                                                                                                                                                                                                                                                                                                                                                                                                                                                                                                            | 10                          | 21                        | 10                                   | 100.0%                              |
| 3                                                                                                                                                                                                                                                                                                                                                                                                                                                                                                            | 18                          | 105                       | 18                                   | 100.0%                              |
| 4                                                                                                                                                                                                                                                                                                                                                                                                                                                                                                            | 30                          | 376                       | 30                                   | 100.0%                              |
| 5                                                                                                                                                                                                                                                                                                                                                                                                                                                                                                            | 50                          | 939                       | 60                                   | 83.3%                               |
| 6                                                                                                                                                                                                                                                                                                                                                                                                                                                                                                            | 31                          | 857                       | 100                                  | 31.0%                               |
| 7                                                                                                                                                                                                                                                                                                                                                                                                                                                                                                            | 18                          | 1030                      | 281                                  | 6.4%                                |
| 8                                                                                                                                                                                                                                                                                                                                                                                                                                                                                                            | 4                           | 435                       | 799                                  | 0.5%                                |
| 9                                                                                                                                                                                                                                                                                                                                                                                                                                                                                                            | 3                           | 311                       | 300                                  | 1.0%                                |
| 10                                                                                                                                                                                                                                                                                                                                                                                                                                                                                                           | 0                           | 168                       | 400                                  | 0.0%                                |
| <b>TOTAL:</b>                                                                                                                                                                                                                                                                                                                                                                                                                                                                                                | <b>164</b>                  | <b>4242</b>               | <b>1998</b>                          | <b>8.2%</b>                         |
| <p>Unique Helix Overlap is the number of helices in common in the assembled database and the set of sequences with known structure. Unique Helix Count is the total number of helices in the set of sequences with known structure. Helices in Assembled Database is the number of helices in the assembled database. Percent Helix Overlap is the Unique Helix Overlap, divided by the Helices in Assembled Database. Therefore, it is the percent of helices in the database that are found in nature.</p> |                             |                           |                                      |                                     |



Table S9. Numbers of helices in helix trimming procedure.

| <b>Helix length (bp)</b> | <b>Starting count</b> | <b>Count after step 1</b> | <b>Count after step 2</b> | <b>Count after step 3</b> | <b>Count after step 4</b> |
|--------------------------|-----------------------|---------------------------|---------------------------|---------------------------|---------------------------|
| 3                        | 32                    | 20                        | 20                        | 20                        | 18                        |
| 4                        | 136                   | 94                        | 93                        | 93                        | 30                        |
| 5                        | 512                   | 257                       | 252                       | 252                       | 60                        |
| 6                        | 2080                  | 520                       | 503                       | 503                       | 100                       |
| 7                        | 8192                  | 1556                      | 1476                      | 1392                      | 281                       |
| 8                        | 32896                 | 4952                      | 4635                      | 4137                      | 799                       |
| 9                        | 131072                | 6526                      | 5955                      | 4793                      | 300                       |
| 10                       | 524800                | 11929                     | 10806                     | 8298                      | 400                       |
| <b>TOTAL</b>             | <b>699720</b>         | <b>25854</b>              | <b>23740</b>              | <b>19488</b>              | <b>1988</b>               |

Table S10. Numbers of single-stranded sequences in loop trimming procedure.

| Sequence Length (nt) | Starting count | Count after step 1 | Count after step 2 | Count after step 3 | Count after step 4 | Count after step 5 |
|----------------------|----------------|--------------------|--------------------|--------------------|--------------------|--------------------|
| 3                    | 64             | 64                 | 64                 | 40                 | 39                 | 18                 |
| 4                    | 256            | 256                | 252                | 150                | 108                | 30                 |
| 5                    | 1024           | 1024               | 996                | 500                | 281                | 60                 |
| 6                    | 4096           | 4096               | 3936               | 1000               | 672                | 100                |
| 7                    | 16384          | 14080              | 13380              | 2000               | 1492               | 150                |
| 8                    | 65536          | 42176              | 39400              | 5691               | 4126               | 260                |
| 9                    | 262144         | 116712             | 106172             | 13183              | 10045              | 496                |
| 10                   | 1048576        | 306184             | 268942             | 27436              | 23237              | 941                |
| <b>TOTAL</b>         | <b>1398080</b> | <b>484592</b>      | <b>433142</b>      | <b>50000</b>       | <b>40000</b>       | <b>2055</b>        |
